# Supplementary material
Source: HighWire-hosted journal article supplement (https://www.jneurosci.org/highwire/filestream/599627/field_highwire_adjunct_files/0/FIgure_S1.pdf)

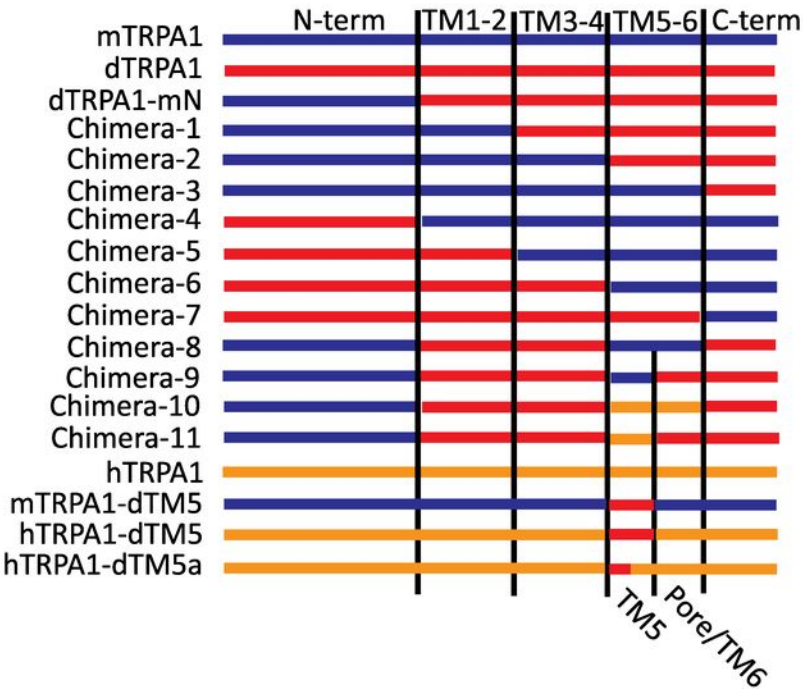

Supplement: FIgure_S1.pdf [file FIgure_S1.pdf]
